# Supplementary material for: Inhibition of soluble epoxide hydrolase attenuates renal tubular mitochondrial dysfunction and ER stress by restoring autophagic flux in diabetic nephropathy
Source: PubMed Central journal article supplement (PMC7242354; doi:10.1038/s41419-020-2594-x), 2020-05-21
Supplement: 41419_2020_2594_MOESM6_ESM.pdf [file 41419_2020_2594_MOESM6_ESM.pdf]

# DECLARATION OF CONTRIBUTIONS TO ARTICLE

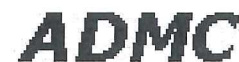

Manuscript Number:

**CDDIS-20-0267**

Journal Name:

*Cell Death & Disease*

(the 'Journal')

Proposed Title of the Contribution:

Inhibition of soluble epoxide hydrolase attenuates renal tubular mitochondrial dysfunction and ER stress by restoring autophagic flux in diabetic nephropathy

(the 'Contribution')

Author(s):

Xu-shun Jiang, Xing-yang Xiang, Xue-mei Chen, Jun-ling He, Ting Liu, Hua Gan, Xiao-gang Du

(the 'Authors')

For all *CDDis* articles, each person named as an author in the published version must be able to show he or she has contributed substantially to the article.

Authorship credit should be based on 1) substantial contributions to conception and design, acquisition of data, or analysis and interpretation of data; 2) drafting the article or revising it critically for important intellectual content; and 3) final approval of the version to be published. Authors should meet conditions 1, 2 and 3.

Any person who cannot be shown to have made a substantial contribution to the article cannot be listed as an author in the final version. The name of any person who is deemed to have made a minor contribution can, however, appear in the Acknowledgments section of the article.

Please complete the table below to indicate the contributions of all named authors to the manuscript.

| Author Full Name: | Specification of Contribution to the Manuscript:                  |
|-------------------|-------------------------------------------------------------------|
| Xu-shun Jiang     | Performed the experiments, analysis of data and wrote the article |
| Xing-yang Xiang   | Performed the experiments and revising the article                |
| Xue-mei Chen      | Interpretation of data and revising the article                   |
| Jun-ling He       | analysis and interpretation of data, wrote the article            |
| Ting Liu          | analysis and interpretation of data                               |
| Hua Gan           | Interpretation of data and revising the article                   |
| Xiao-gang Du      | Conceived and designed the experiments                            |
|                   |                                                                   |
|                   |                                                                   |
|                   |                                                                   |
|                   |                                                                   |
|                   |                                                                   |
|                   |                                                                   |
|                   |                                                                   |
|                   |                                                                   |

Please complete the table below to indicate the contributions of all named authors to the figures.

Figure 1:

Xu-shun Jiang : Performed the experiments  
Xing-yang Xiang: Performed the experiments  
Ting Liu: analysis and interpretation of data  
Xiao-gang Du: Designed the experiments

Figure 2:

Xu-shun Jiang : Performed the experiments  
Xing-yang Xiang: Performed the experiments  
Xue-mei Chen: Interpretation of data  
Jun-ling He: analysis and interpretation of data  
Xiao-gang Du: Designed the experiments

Figure 3:

Xu-shun Jiang : Performed the experiments  
Xing-yang Xiang: Performed the experiments  
Xue-mei Chen: Interpretation of data  
Jun-ling He: analysis of data  
Xiao-gang Du: Designed the experiments

Figure 4:

Xu-shun Jiang : Performed the experiments  
Xing-yang Xiang: Performed the experiments  
Xue-mei Chen: Interpretation of data  
Jun-ling He: analysis and interpretation of data  
Xiao-gang Du: Designed the experiments

Figure 5:

Xu-shun Jiang : Performed the experiments  
Xing-yang Xiang: Performed the experiments  
Xue-mei Chen: Interpretation of data  
Ting Liu: analysis of data  
Xiao-gang Du: Designed the experiments

Figure 6:

Xu-shun Jiang : Performed the experiments  
Xing-yang Xiang: Performed the experiments  
Hua Gan: Interpretation of data  
Jun-ling He: analysis and interpretation of data  
Xiao-gang Du: Designed the experiments

Signed for and on behalf of the Author(s):

Print Name:

Date:

Xiao-gang Du

Xiao-gang Du

2020-01-26
