# Supplementary material for: Inhibition of soluble epoxide hydrolase attenuates renal tubular mitochondrial dysfunction and ER stress by restoring autophagic flux in diabetic nephropathy
Source: PubMed Central journal article supplement (PMC7242354; doi:10.1038/s41419-020-2594-x), 2020-05-21
Supplement: 41419_2020_2594_MOESM7_ESM.pdf [file 41419_2020_2594_MOESM7_ESM.pdf]

## Reporting Checklist

This checklist is used to ensure good reporting standards and to improve the reproducibility of published results. **Please respond completely to all questions relevant to your manuscript.** For more information, please read the journal's Guide to Authors.

Check here to confirm that the following information is available in the Material & Methods section:

- the **exact sample size (*n*)** for each experimental group/condition, given as a number, not a range;
- a **description of the sample collection** allowing the reader to understand whether the samples represent **technical or biological replicates** (including how many animals, litters, culture, etc.);
- a **statement of how many times the experiment shown was replicated in the laboratory**;
- **definitions of statistical methods and measures:** (For small sample sizes ( $n < 5$ ) descriptive statistics are not appropriate, instead plot individual data points)
  - very common tests, such as *t*-test, simple  $\chi^2$  tests, Wilcoxon and Mann-Whitney tests, can be unambiguously identified by name only, but more complex techniques should be described in the methods section;
  - are tests one-sided or two-sided?
  - are there adjustments for multiple comparisons?
  - **statistical test results**, e.g., ***P* values**;
  - definition of '**center values**' as **median or mean**;
  - definition of **error bars as s.d. or s.e.m. or c.i.**

Please ensure that the answers to the following questions are reported **in the manuscript itself**. We encourage you to include a specific subsection in the methods section for statistics, reagents and animal models. Below, provide the page number or section and paragraph number.

### Statistics and general methods

1. How was the sample size chosen to ensure adequate power to detect a pre-specified effect size? (Give section/paragraph or page #)

#### Reported in section/paragraph or page #

|                                 |
|---------------------------------|
| Reported in the methods section |
| Reported in the methods section |
| Not available                   |
| Reported in the methods section |
| Reported in the methods section |

For animal studies, include a statement about sample size estimate even if no statistical methods were used.

2. Describe inclusion/exclusion criteria if samples or animals were excluded from the analysis. Were the criteria pre-established? (Give section/paragraph or page #)

3. If a method of randomization was used to determine how samples/animals were allocated to experimental groups and processed, describe it. (Give section/paragraph or page #)

For animal studies, include a statement about randomization even if no randomization was used.

|                                                                                                                                                                                      |                                 |
|--------------------------------------------------------------------------------------------------------------------------------------------------------------------------------------|---------------------------------|
| 4. If the investigator was blinded to the group allocation during the experiment and/or when assessing the outcome, state the extent of blinding. (Give section/paragraph or page #) | Reported in the methods section |
| For animal studies, include a statement about blinding even if no blinding was done.                                                                                                 | Reported in the methods section |
| 5. For every figure, are statistical tests justified as appropriate?                                                                                                                 | Reported in the methods section |
| Do the data meet the assumptions of the tests (e.g., normal distribution)?                                                                                                           | Reported in the methods section |
| Is there an estimate of variation within each group of data?                                                                                                                         | Reported in the methods section |
| Is the variance similar between the groups that are being statistically compared? (Give section/paragraph or page #)                                                                 | Reported in the methods section |

**Reagents**

**Reported in section/paragraph or page #**

|                                                                                                                                                      |                                 |
|------------------------------------------------------------------------------------------------------------------------------------------------------|---------------------------------|
| 6. Report the source of antibodies (vendor and catalog number)                                                                                       | Reported in the methods section |
| 7. Identify the source of cell lines and report if they were recently authenticated (e.g., by STR profiling) and tested for mycoplasma contamination | Reported in the methods section |

**Animal Models**

**Reported in section/paragraph or page #**

|                                                                                                                                                                    |                                 |
|--------------------------------------------------------------------------------------------------------------------------------------------------------------------|---------------------------------|
| 8. Report species, strain, sex and age of animals                                                                                                                  | Reported in the methods section |
| 9. For experiments involving live vertebrates, include a statement of compliance with ethical regulations and identify the committee(s) approving the experiments. | Reported in the methods section |

10. We recommend consulting the ARRIVE guidelines ([PLoS Biol. 8\(6\), e1000412,2010](https://doi.org/10.1371/journal.plosbio.1000412)) to ensure that other relevant aspects of animal studies are adequately reported.

### Human subjects

### Reported in section/paragraph or page #

|                                                                                                                                  |               |
|----------------------------------------------------------------------------------------------------------------------------------|---------------|
| 11. Identify the committee(s) approving the study protocol.                                                                      | Not available |
| 12. Include a statement confirming that informed consent was obtained from all subjects.                                         | Not available |
| 13. For publication of patient photos, include a statement confirming that consent to publish was obtained.                      | Not available |
| 14. Report the clinical trial registration number (at <a href="http://ClinicalTrials.gov">ClinicalTrials.gov</a> or equivalent). | Not available |

15. For phase II and III randomized controlled trials, please refer to the [CONSORT statement](#) and submit the CONSORT checklist with your submission.

16. For tumor marker prognostic studies, we recommend that you follow the [REMARK reporting guidelines](#).

### Data deposition

### Reported in section/paragraph or page #

|                                                                                                                                                                                                                                                     |               |
|-----------------------------------------------------------------------------------------------------------------------------------------------------------------------------------------------------------------------------------------------------|---------------|
| 17. Provide accession codes for deposited data. Data deposition in a public repository is mandatory for:<br>a. Protein, DNA and RNA sequences<br>b. Macromolecular structures<br>c. Crystallographic data for small molecules<br>d. Microarray data | Not available |
|-----------------------------------------------------------------------------------------------------------------------------------------------------------------------------------------------------------------------------------------------------|---------------|

Deposition is strongly recommended for many other datasets for which structured public repositories exist; more details on our data policy are available in the Guide to Authors. We encourage the provision of other source data in supplementary information or in unstructured repositories such as [Figshare](#) and [Dryad](#). We encourage publication of Data Descriptors (see [Scientific Data](#)) to maximize data reuse.

|                                                                                                                                                                                                                                                                                                                   |               |
|-------------------------------------------------------------------------------------------------------------------------------------------------------------------------------------------------------------------------------------------------------------------------------------------------------------------|---------------|
| 18. If computer code was used to generate results that are central to the paper's conclusions, include a statement in the Methods section under " <b>Code availability</b> " to indicate whether and how the code can be accessed. Include version information as necessary and any restrictions on availability. | Not available |
|-------------------------------------------------------------------------------------------------------------------------------------------------------------------------------------------------------------------------------------------------------------------------------------------------------------------|---------------|
